# Supplementary material
Source: PubMed Central journal article supplement (PMC3926045)
Supplement: 1400126111_pnas.201400126SI.pdf [file 1400126111_pnas.201400126SI.pdf]

# Supporting Information

Kang et al. 10.1073/pnas.1400126111

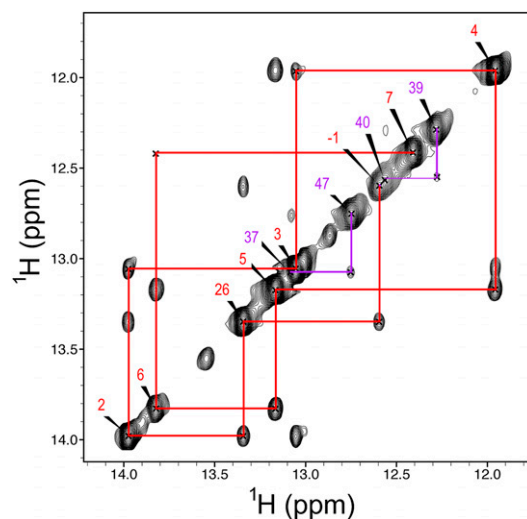

**Fig. S1.** Imino region of the 2D nuclear Overhauser effect spectroscopy (NOESY) 1-1 echo spectrum at 27 °C of prequeuosine class II (preQ<sub>1</sub>-II) riboswitch in 60 mM KCl, pH 6.3, on an 800-MHz NMR spectrometer. Red and purple lines show sequential imino connectivities in P2 and P4, respectively.

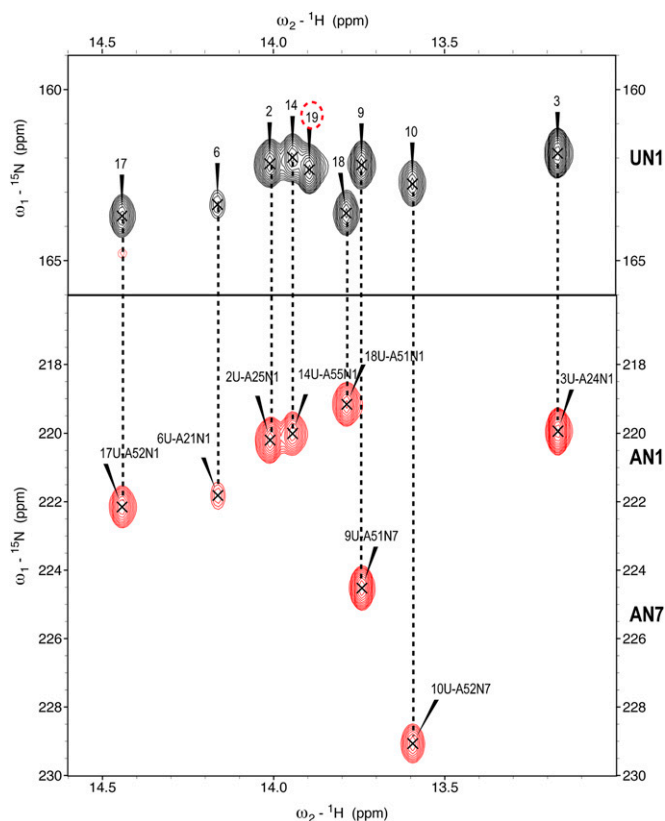

**Fig. S2.** Pseudo-heteronuclear correlation spectroscopy ( $J_{\text{NN}}$ -COSY) spectrum of WT preQ<sub>1</sub>-II riboswitch at 27 °C in 60 mM KCl, 3 mM CaCl<sub>2</sub>, 2 equivalents of preQ<sub>1</sub>, pH 6.3, on an 800-MHz NMR spectrometer, showing the correlation between imino protons and corresponding nitrogens in Watson-Crick or Hoogsteen base pairs. No correlation is observed for U19.

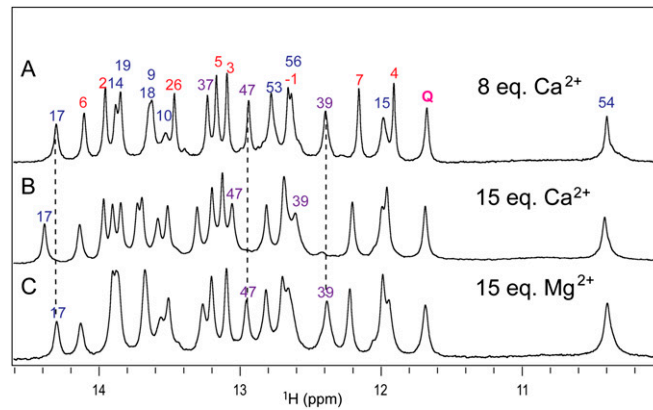

Fig. 53. One-dimensional imino proton spectra at 27 °C of preQ<sub>1</sub>-II riboswitch in 60 mM KCl, 2 equivalents of preQ<sub>1</sub> with 8 equivalents of CaCl<sub>2</sub> on 800 MHz (A), 15 equivalents of CaCl<sub>2</sub> on 600 MHz (B), and 15 equivalents of MgCl<sub>2</sub> on 600 MHz (C). The spectra show that 8 equivalents of Ca<sup>2+</sup> result in almost the same chemical shifts as 15 equivalents of Mg<sup>2+</sup>.

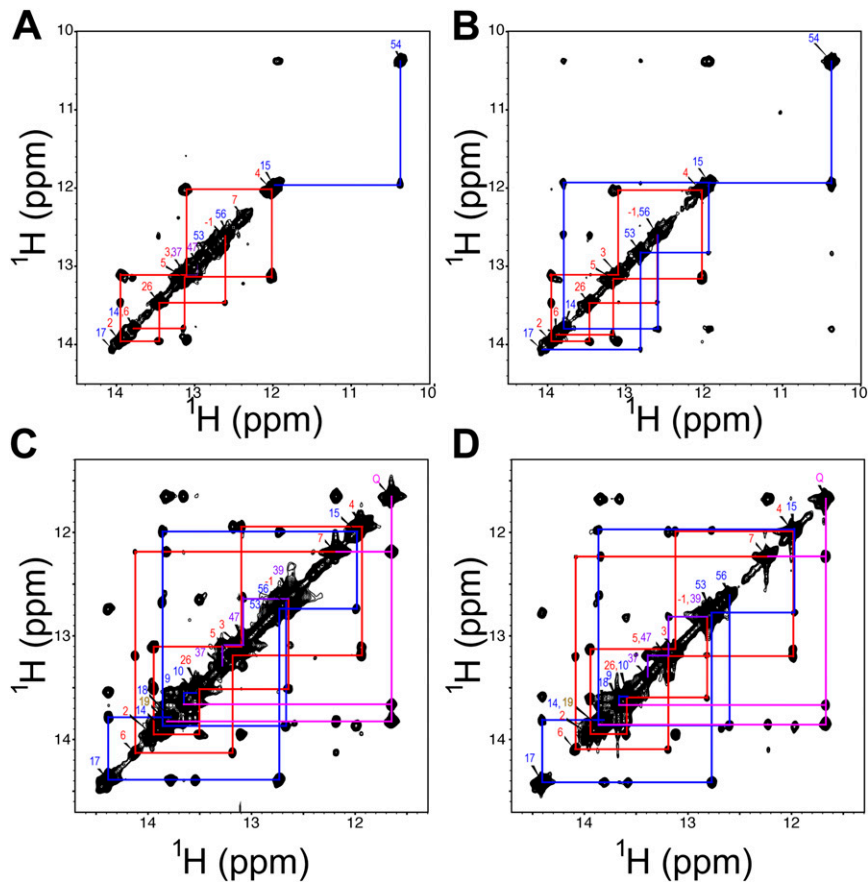

Fig. 54. Imino region of the 2D NOESY 1-1 echo spectrum at 27 °C of WT (A) and ΔP4(36-49) preQ<sub>1</sub>-II riboswitch (B) in 60 mM KCl, 4 mM (20 equivalents) CaCl<sub>2</sub>, pH 6.3, on 800 MHz, and WT (C) and (ΔA33C34) preQ<sub>1</sub>-II riboswitch (D) in 60 mM KCl, 3 mM CaCl<sub>2</sub>, 2 equivalents of preQ<sub>1</sub>, pH 6.3, on 800 MHz. Red, blue, and purple lines show sequential imino connectivities in P2, P3, and P4, respectively.

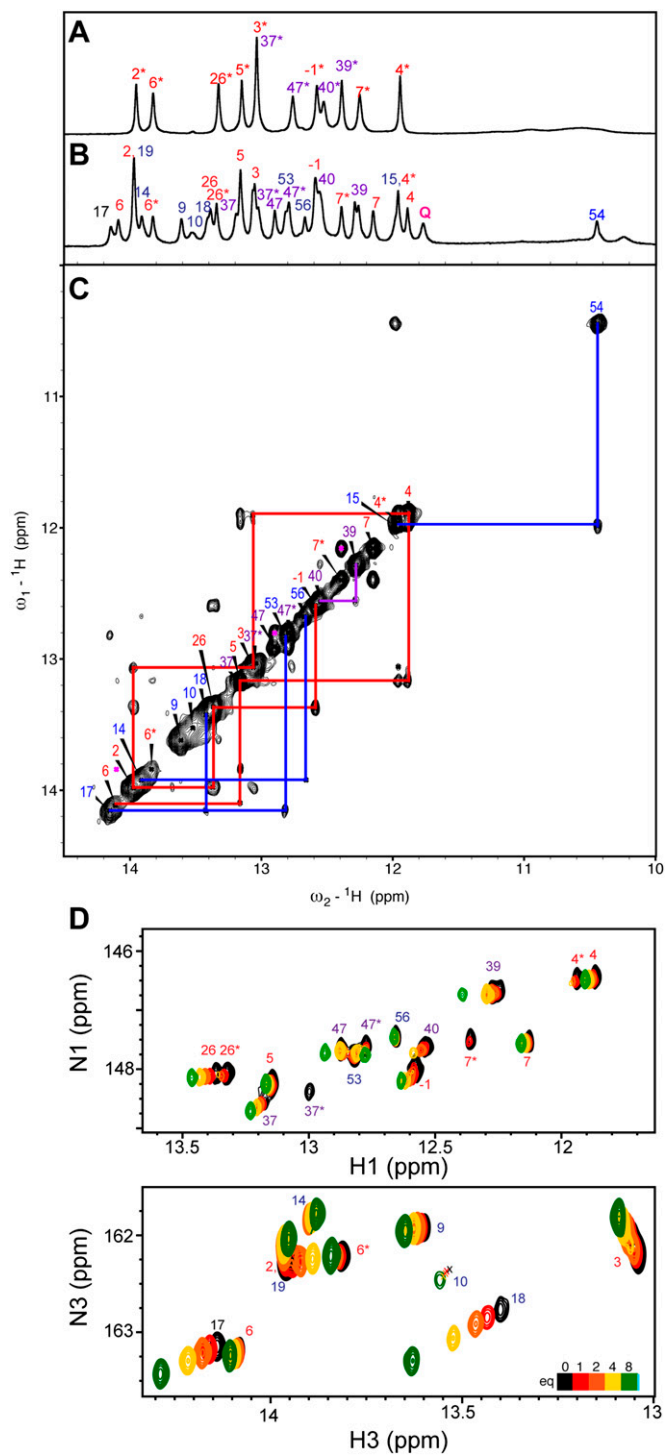

**Fig. S5.** (A and B) One-dimensional imino proton spectra at 27 °C of preQ<sub>1</sub>-II riboswitch in 60 mM KCl (A) and 60 mM KCl and 2 equivalents of preQ<sub>1</sub> (B). (C) Imino region of the 2D NOESY 1-1 echo spectrum at 27 °C of B on 800 MHz. Red, blue, and purple lines show sequential imino connectivities in P2, P3, and P4, respectively (corresponding to labels in A and B). (D) <sup>1</sup>H-<sup>15</sup>N heteronuclear single-quantum correlation (HSQC) spectra of preQ<sub>1</sub>-II riboswitch as a function of added Ca<sup>2+</sup>, from 0 equivalents to 8 equivalents, in 60 mM KCl, 2 equivalents of preQ<sub>1</sub>, pH 6.3, at 27 °C on 800 MHz. The intensity of the U10 N3-H3 cross-peak is too low to be visible at the contour levels shown at Ca<sup>2+</sup> below 8 equivalents; its chemical shift positions are marked with an “x”.

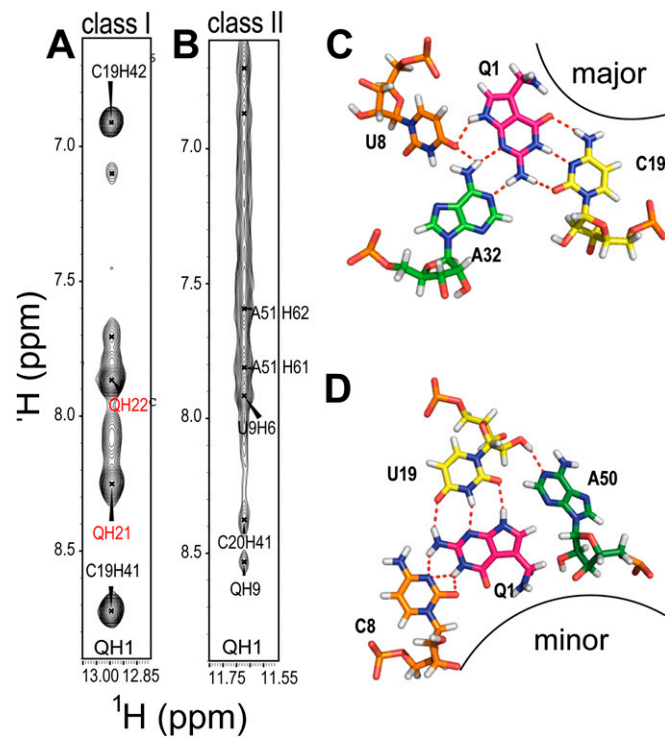

**Fig. S6.** (A and B) Slices of nuclear Overhauser effect (NOE) cross-peaks of preQ<sub>1</sub> H1 from 2D NOESY 1-1 echo spectra at 27 °C of *Bacillus subtilis queC* (*Bsu*) preQ<sub>1</sub>-I riboswitch in 50 mM KCl, 2 equivalents of preQ<sub>1</sub> (31) (A) and *Streptococcus pneumoniae* (*Spn*) preQ<sub>1</sub>-II riboswitch in 60 mM KCl, 3 mM CaCl<sub>2</sub>, and 2 equivalents of preQ<sub>1</sub> (B). (C and D) PreQ<sub>1</sub>-base interactions in *Bsu* preQ<sub>1</sub>-I riboswitch (C) and *Spn* preQ<sub>1</sub>-II riboswitch (D).

**Table S1. NMR constraints and structure statistics for *Spn* preQ<sub>1</sub>-II riboswitch (59 nt)**

| Statistic                                                                               | Value          |
|-----------------------------------------------------------------------------------------|----------------|
| Distance constraints                                                                    |                |
| Total NOE                                                                               | 866            |
| Intraresidue                                                                            | 306            |
| Interresidue                                                                            | 516            |
| Sequential ( $ i - j  = 1$ )                                                            | 326            |
| Nonsequential ( $ i - j  > 1$ )                                                         | 190            |
| Intermolecular (preQ <sub>1</sub> -RNA)                                                 | 44             |
| Hydrogen bond constraints                                                               | 122            |
| Total RDCs ( <sup>1</sup> D <sub>CH</sub> and <sup>1</sup> D <sub>NH</sub> )            | 103            |
| Total dihedral angle constraints                                                        | 220            |
| Ribose                                                                                  | 59             |
| Glycosidic bond                                                                         | 59             |
| Backbone, based on A-form geometry                                                      | 102            |
| Structure statistics                                                                    |                |
| Violations, mean ± SD                                                                   |                |
| Distance constraints, Å                                                                 | 0.039 ± 0.004  |
| Dihedral angle constraints, °                                                           | 0.26 ± 0.06    |
| Maximum dihedral angle violation, °                                                     | 0.36           |
| Maximum distance constraint violation, Å                                                | 0.05           |
| Dipolar coupling, Hz                                                                    | 0.59 ± 0.06    |
| Deviations from idealized geometry                                                      |                |
| Bond length, Å                                                                          | 0.006 ± 0.0004 |
| Bond angle, °                                                                           | 1.16 ± 0.02    |
| Impropers, °                                                                            | 0.59 ± 0.05    |
| Average pairwise rmsd from mean, Å*                                                     |                |
| All heavy atoms (residues in P2, P3, P4, and preQ <sub>1</sub> )                        | 1.13 ± 0.18    |
| All heavy atoms (residues in P2, P3, and preQ <sub>1</sub> )                            | 0.95 ± 0.22    |
| preQ <sub>1</sub> binding pocket (residues 8–10,17–19,35,50–52, and preQ <sub>1</sub> ) | 0.71 ± 0.19    |
| Number of NOE violations >0.5, Å                                                        | 0.17 ± 0.51    |
| Number of NOE violations >0.2 from P2, P3, and P4, Å                                    | 0.11 ± 0.32    |
| Number of dihedral violations >5, °                                                     | 0.88 ± 0.90    |
| Number of RDC violations >2, Hz                                                         | 1.38 ± 1.14    |

\*Pairwise rmsd was calculated among 18 refined structures.

**Table S2. ITC measurements for *Spn* preQ<sub>1</sub>-II riboswitch and mutants**

| RNA          | Cation (3 mM)    | K <sub>D</sub> , nM | N          | ΔH, kcal/mol | –TΔS, kcal/mol* | ΔG, kcal/mol <sup>†</sup> | ΔΔG, kcal/mol <sup>‡</sup> |
|--------------|------------------|---------------------|------------|--------------|-----------------|---------------------------|----------------------------|
| WT           | None             | 6,500 ± 700         | 1.2 ± 0.2  | –31 ± 1.6    | 24 ± 3          | –7.1 ± 3.5                | 2.6                        |
| WT           | Mg <sup>2+</sup> | 86 ± 3              | 0.9 ± 0.01 | –24 ± 0.1    | 14 ± 0.1        | –9.6 ± 0.1                | 0.1                        |
| WT           | Ca <sup>2+</sup> | 75 ± 10             | 0.9 ± 0.04 | –27 ± 0.8    | 17 ± 0.8        | –9.7 ± 0.1                | –                          |
| P1+WT        | Ca <sup>2+</sup> | 220 ± 30            | 0.6 ± 0.05 | –26 ± 3.3    | 17 ± 3          | –9.1 ± 4.7                | 0.6                        |
| ΔP4(36-49)   | Ca <sup>2+</sup> | 2,000 ± 300         | 0.5 ± 0.06 | –16 ± 0.6    | 8 ± 2           | –7.8 ± 2.2                | 1.5                        |
| A35G         | Ca <sup>2+</sup> | 950 ± 300           | 0.8 ± 0.0  | –17 ± 1.5    | 9 ± 2           | –8.2 ± 2.2                | 1.9                        |
| A50G         | Ca <sup>2+</sup> | 24,000 ± 6,000      | 0.9 ± 0.1  | –10 ± 1.6    | 4 ± 2           | –6.3 ± 2.2                | 3.4                        |
| ΔA33C34      | Ca <sup>2+</sup> | 190 ± 10            | 1.1 ± 0.0  | –22 ± 0.1    | 13              | –9.2                      | 0.5                        |
| ΔA33C34+A35U | Ca <sup>2+</sup> | 900 ± 100           | 1.2 ± 0.6  | –23 ± 4.2    | 15 ± 4          | –8.3 ± 6                  | 1.5                        |

\* –TΔS was calculated using T = 298.15 K.

<sup>†</sup>ΔG is reported as Gibbs free energy, ΔG = ΔH – TΔS.

<sup>‡</sup>ΔΔG is calculated relative to WT in Ca<sup>2+</sup>.

RNA sequences (modified or deleted residues indicated by either underlines or dashes):

P1+WT:

gguugaagaaucaacc - CUUGGUGCUUAGCUUCUUCACCAAGCAUUUACACGCGGAUAACCGCCAAAGGAGAA

WT:

gCUUGGUGCUUAGCUUCUUCACCAAGCAUUUACACGCGGAUAACCGCCAAAGGAGAA

ΔP4(36-49):

gCUUGGUGCUUAGCUUCUUCACCAAGCAUUUACA - - - - - AAAGGAGAA

A35G:

gCUUGGUGCUUAGCUUCUUCACCAAGCAUUUACCGC~~CG~~GAUAACCGCCAAAGGAGAA

A50G:

gCUUGGUGCUUAGCUUCUUCACCAAGCAUUUACACGCGGAUAACCGCCGAAGGAGAA

ΔA33C34:

gCUUGGUGCUUAGCUUCUUCACCAAGCAUUU - -ACGCGGAUAACCGCCAAAGGAGAA

ΔA33C34+A35U:

gCUUGGUGCUUAGCUUCUUCACCAAGCAUUU - -UCCGCGGAUAACCGCCAAAGGAGAA

**Table S3. Table of RDCs**

| Residue    | Atom          | RDC, Hz | Residue    | Atom          | RDC, Hz | Residue    | Atom          | RDC, Hz |
|------------|---------------|---------|------------|---------------|---------|------------|---------------|---------|
| G-1        | <i>C8H8</i>   | -2.69   | U19*       | C1'H1'        | -8.58   | C38*       | C5H5          | 21.11   |
| G-1        | <i>C1'H1'</i> | 12.91   | C20*       | C6H6          | -9.65   | G39*       | N1H1          | 7.68    |
| G-1        | N1H1          | -1.53   | C20*       | C5H5          | 23.08   | G39        | C8H8          | -16.13  |
| C1         | <i>C5H5</i>   | 14.16   | C20*       | C1'H1'        | -8.73   | G39*       | C1'H1'        | 14.18   |
| U2*        | N3H3          | -0.32   | A21*       | C2H2          | -2.28   | G40        | C1'H1'        | 1.53    |
| U2*        | C5H5          | -12.57  | A21*       | C1'H1'        | -12.69  | <i>A41</i> | <i>C1'H1'</i> | -6.95   |
| U3*        | N3H3          | -9.68   | C22*       | C5H5          | -8.54   | A43        | C8H8          | -7.24   |
| U3*        | C5H5          | -9.1    | C22*       | C1'H1'        | -17.4   | <i>A43</i> | <i>C1'H1'</i> | -1.33   |
| <i>U3</i>  | <i>C1'H1'</i> | -13.07  | C23*       | C5H5          | -6.38   | <i>A43</i> | <i>C2H2</i>   | 6.83    |
| G4*        | N1H1          | -11.71  | A24*       | C8H8          | 27.39   | <i>A44</i> | <i>C2H2</i>   | -5.45   |
| G4*        | C8H8          | 26.05   | A24*       | C2H2          | 20.97   | C45        | C5H5          | 12.09   |
| G4*        | C1'H1'        | -8.53   | A25*       | C8H8          | 22.11   | C46*       | C5H5          | 11.88   |
| G5*        | N1H1          | -2.61   | A25*       | C1'H1'        | 3.33    | C46*       | C1'H1'        | 1.21    |
| G5*        | C8H8          | 21.22   | G26*       | N1H1          | 4.69    | G47*       | N1H1          | 3       |
| G5*        | C1'H1'        | -3.68   | G26*       | C8H8          | -4.96   | G47*       | C8H8          | -17.58  |
| U6*        | N3H3          | 3.27    | G26*       | C1'H1'        | 1.8     | G47*       | C1'H1'        | -8.14   |
| U6*        | C5H5          | 24.55   | C27        | C6H6          | -4.55   | <i>C48</i> | <i>C6H6</i>   | 21.43   |
| G7*        | N1H1          | 2.3     | C27        | C5H5          | 5       | C48        | C5H5          | -14.15  |
| G7*        | C8H8          | -11.66  | <i>A28</i> | <i>C2H2</i>   | -6.29   | <i>C49</i> | <i>C6H6</i>   | 22.65   |
| C8*        | C6H6          | -3.82   | <i>A28</i> | <i>C1'H1'</i> | -10.86  | C49        | C5H5          | -6.93   |
| C8*        | C5H5          | -3.93   | <i>U29</i> | <i>C6H6</i>   | 10.92   | C49*       | C1'H1'        | 4.84    |
| C8*        | C1'H1'        | -8.74   | <i>U29</i> | <i>C5H5</i>   | -0.19   | A50*       | C8H8          | 17.25   |
| U9*        | N3H3          | 0.14    | <i>U29</i> | <i>C1'H1'</i> | -1.39   | A50*       | C2H2          | -0.45   |
| U9*        | C5H5          | -5.9    | A30        | C8H8          | 1.28    | A50*       | C1'H1'        | -7.68   |
| U10*       | N3H3          | -9.84   | A30        | C2H2          | 3.54    | A51*       | C1'H1'        | -13.55  |
| U10*       | C5H5          | -11.91  | A30        | <i>C1'H1'</i> | 3.49    | A52*       | C2H2          | 23.32   |
| A11*       | C8H8          | 8.14    | <i>U31</i> | <i>C6H6</i>   | 4.03    | A52*       | C1'H1'        | -6.51   |
| A11*       | C1'H1'        | -7.03   | <i>U31</i> | <i>C5H5</i>   | -1.18   | G53*       | N1H1          | 5.31    |
| G12*       | C8H8          | 2.07    | <i>U31</i> | <i>C1'H1'</i> | 0.3     | G53*       | C8H8          | -3.16   |
| G12*       | C1'H1'        | -9.56   | <i>U32</i> | <i>C6H6</i>   | 3.39    | G53*       | C1'H1'        | -6.47   |
| C13*       | C5H5          | -1.01   | <i>U32</i> | <i>C1'H1'</i> | 0.19    | G54*       | N1H1          | 3.43    |
| <i>C13</i> | <i>C1'H1'</i> | -11.49  | A33        | C8H8          | 3.32    | G54*       | C8H8          | -9.41   |
| U14*       | N3H3          | -8.1    | A33        | C2H2          | 1.65    | G54*       | C1'H1'        | -9.38   |
| <i>U14</i> | <i>C5H5</i>   | 22.17   | A33        | <i>C1'H1'</i> | 2.55    | A55*       | C2H2          | -9.19   |
| U15*       | N3H3          | -2.92   | <i>C34</i> | <i>C6H6</i>   | 3.74    | A55*       | C1'H1'        | -9.19   |
| U15*       | C5H5          | 26.78   | <i>C34</i> | <i>C5H5</i>   | -1.81   | G56        | N1H1          | -14.15  |
| C16*       | C5H5          | 15.99   | <i>C34</i> | <i>C1'H1'</i> | 1.22    | G56        | C8H8          | 24.49   |
| U17*       | N3H3          | 0.75    | A35        | C8H8          | -10.46  | G56        | C1'H1'        | -6.37   |
| U18*       | N3H3          | -7.27   | A35*       | C2H2          | -18.2   | A57        | C8H8          | 25.01   |
| U18*       | C1'H1'        | -11.51  | A35        | C1'H1'        | -9.98   | A57        | C2H2          | 9.66    |
| U18*       | C5H5          | -8.45   | G37        | N1H1          | 0.11    | A57        | C1'H1'        | 6.3     |
| U19*       | N3H3          | -10.23  | G37        | C8H8          | 15.37   | A58        | C8H8          | 2.81    |
| U19        | C6H6          | 17.75   | C38*       | C6H6          | -9.88   | A58        | C2H2          | 13.92   |
| U19*       | C5H5          | 6.81    | C38*       | C1'H1'        | 11.59   | A58        | C1'H1'        | 8.67    |

\*RDCs used in GDO analysis.

RDCs not used for final structural refinements are in italic type.

Table S4. Table of  $R_1$  and  $R_2$  values

| Residue | Atom | $R_1$ , Hz  | $R_2$ , Hz   | Residue | Atom | $R_1$ , Hz  | $R_2$ , Hz   |
|---------|------|-------------|--------------|---------|------|-------------|--------------|
| G-1     | C8   | 1.63 ± 0.03 | 64.75 ± 0.87 | U29     | C6   | 2.17 ± 0.02 | 42.66 ± 0.36 |
| G-1     | C1'  | 0.96 ± 0.03 | 46.48 ± 1.33 | U29     | C5   | 1.98 ± 0.01 | 46.95 ± 0.35 |
| C1      | C5   | 1.62 ± 0.03 | 77.14 ± 1.01 | U29     | C1'  | 1.69 ± 0.01 | 24.92 ± 0.38 |
| C1      | C1'  | 0.85 ± 0.04 | 44.49 ± 1.64 | A30     | C8   | 1.90 ± 0.01 | 28.92 ± 0.20 |
| U2      | C6   | 1.29 ± 0.07 | 77.84 ± 2.64 | A30     | C2   | 1.78 ± 0.01 | 21.54 ± 0.30 |
| U2      | C5   | 1.43 ± 0.03 | 80.42 ± 1.28 | U31     | C6   | 2.69 ± 0.01 | 28.53 ± 0.18 |
| U3      | C6   | 1.42 ± 0.07 | 74.08 ± 2.45 | U31     | C5   | 2.30 ± 0.01 | 34.25 ± 0.22 |
| U3      | C5   | 1.50 ± 0.03 | 83.89 ± 1.35 | U31     | C1'  | 1.91 ± 0.01 | 20.12 ± 0.23 |
| U3      | C1'  | 0.97 ± 0.03 | 48.18 ± 1.51 | U32     | C6   | 2.68 ± 0.01 | 29.81 ± 0.18 |
| G4      | C8   | 0.80 ± 0.04 | 60.83 ± 1.40 | U32     | C5   | 2.31 ± 0.01 | 32.95 ± 0.21 |
| G4      | C1'  | 0.94 ± 0.03 | 46.48 ± 1.50 | U32     | C1'  | 1.86 ± 0.01 | 20.89 ± 0.22 |
| G5      | C8   | 0.86 ± 0.04 | 60.90 ± 1.34 | A33     | C8   | 2.02 ± 0.01 | 28.67 ± 0.22 |
| G5      | C1'  | 0.92 ± 0.03 | 42.04 ± 1.25 | A33     | C2   | 1.98 ± 0.01 | 34.84 ± 0.15 |
| U6      | C6   | 0.96 ± 0.04 | 80.11 ± 3.49 | A33     | C1'  | 1.78 ± 0.02 | 22.67 ± 0.35 |
| U6      | C5   | 1.63 ± 0.04 | 73.98 ± 1.39 | C34     | C6   | 2.43 ± 0.02 | 43.16 ± 0.33 |
| U6      | C1'  | 0.96 ± 0.04 | 44.79 ± 1.85 | C34     | C5   | 2.16 ± 0.01 | 44.74 ± 0.34 |
| G7      | C8   | 0.84 ± 0.04 | 63.20 ± 1.51 | C34     | C1'  | 1.80 ± 0.02 | 27.39 ± 0.54 |
| G7      | C1'  | 0.86 ± 0.03 | 46.40 ± 1.59 | A35     | C8   | 1.07 ± 0.04 | 65.55 ± 1.34 |
| C8      | C6   | 1.41 ± 0.08 | 80.64 ± 3.11 | A35     | C2   | 1.34 ± 0.05 | 78.15 ± 2.07 |
| C8      | C5   | 1.45 ± 0.03 | 85.36 ± 1.64 | A35     | C1'  | 0.92 ± 0.06 | 48.22 ± 2.31 |
| C8      | C1'  | 0.85 ± 0.06 | 43.03 ± 2.91 | G37     | C8   | 1.03 ± 0.04 | 60.73 ± 1.29 |
| U9      | C5   | 1.45 ± 0.05 | 81.39 ± 2.07 | G37     | C1'  | 1.00 ± 0.03 | 49.69 ± 1.58 |
| U9      | C1'  | 0.94 ± 0.04 | 48.01 ± 2.09 | C38     | C6   | 1.57 ± 0.06 | 77.85 ± 1.97 |
| U10     | C6   | 1.42 ± 0.09 | 84.93 ± 3.46 | C38     | C1'  | 0.93 ± 0.05 | 41.07 ± 0.86 |
| U10     | C5   | 1.37 ± 0.08 | 85.07 ± 3.51 | G39     | C8   | 1.01 ± 0.04 | 64.12 ± 1.34 |
| U10     | C1'  | 0.83 ± 0.08 | 44.28 ± 3.61 | G39     | C1'  | 0.97 ± 0.02 | 38.76 ± 0.85 |
| A11     | C8   | 1.39 ± 0.07 | 46.00 ± 1.89 | G40     | C1'  | 1.04 ± 0.04 | 39.65 ± 1.54 |
| A11     | C1'  | 1.14 ± 0.05 | 46.45 ± 2.11 | A41     | C1'  | 1.10 ± 0.02 | 42.80 ± 0.98 |
| G12     | C8   | 1.13 ± 0.03 | 55.96 ± 0.80 | A43     | C2   | 1.14 ± 0.02 | 68.15 ± 0.66 |
| G12     | C1'  | 1.06 ± 0.03 | 43.75 ± 1.47 | C45     | C6   | 1.65 ± 0.06 | 72.33 ± 2.12 |
| C13     | C6   | 1.50 ± 0.08 | 77.44 ± 2.69 | C45     | C5   | 1.76 ± 0.02 | 64.84 ± 0.86 |
| C13     | C5   | 1.54 ± 0.04 | 85.31 ± 1.73 | C46     | C5   | 1.67 ± 0.03 | 73.31 ± 1.04 |
| C13     | C1'  | 0.96 ± 0.02 | 42.71 ± 2.38 | C46     | C1'  | 1.01 ± 0.02 | 41.81 ± 0.87 |
| U15     | C6   | 1.26 ± 0.08 | 82.15 ± 3.22 | G47     | C8   | 1.08 ± 0.03 | 57.71 ± 0.88 |
| U15     | C5   | 1.52 ± 0.04 | 78.91 ± 1.60 | G47     | C1'  | 0.99 ± 0.02 | 41.69 ± 0.90 |
| C16     | C5   | 1.52 ± 0.04 | 79.77 ± 1.77 | C48     | C1'  | 0.93 ± 0.02 | 42.17 ± 0.78 |
| U18     | C1'  | 0.92 ± 0.04 | 46.44 ± 1.61 | C49     | C6   | 1.52 ± 0.05 | 70.59 ± 1.88 |
| U19     | C5   | 1.59 ± 0.04 | 81.01 ± 1.64 | C49     | C5   | 1.60 ± 0.02 | 73.93 ± 1.00 |
| U19     | C1'  | 1.02 ± 0.07 | 42.07 ± 3.07 | C49     | C1'  | 1.05 ± 0.03 | 40.81 ± 1.02 |
| C20     | C6   | 1.34 ± 0.10 | 80.28 ± 3.69 | A50     | C8   | 0.98 ± 0.04 | 55.33 ± 1.23 |
| C20     | C5   | 1.68 ± 0.04 | 70.13 ± 1.39 | A50     | C2   | 0.96 ± 0.05 | 74.72 ± 1.56 |
| C20     | C1'  | 0.81 ± 0.05 | 49.34 ± 2.96 | A50     | C1'  | 0.94 ± 0.06 | 45.48 ± 3.05 |
| A21     | C8   | 0.89 ± 0.03 | 63.25 ± 0.98 | A51     | C8   | 1.50 ± 0.09 | 62.29 ± 1.92 |
| A21     | C2   | 0.88 ± 0.03 | 74.42 ± 1.48 | A51     | C2   | 0.89 ± 0.02 | 72.33 ± 0.89 |
| A21     | C1'  | 0.89 ± 0.04 | 45.18 ± 1.93 | A51     | C1'  | 0.72 ± 0.07 | 48.95 ± 3.01 |
| C22     | C6   | 1.56 ± 0.06 | 76.68 ± 2.03 | A52     | C8   | 0.97 ± 0.03 | 59.65 ± 1.30 |
| C22     | C5   | 1.50 ± 0.05 | 88.24 ± 2.17 | A52     | C2   | 0.89 ± 0.02 | 72.33 ± 0.89 |
| C22     | C1'  | 0.90 ± 0.03 | 48.35 ± 1.80 | A52     | C1'  | 0.89 ± 0.05 | 49.28 ± 2.81 |
| C23     | C5   | 1.50 ± 0.04 | 81.47 ± 1.62 | G53     | C8   | 0.90 ± 0.08 | 62.41 ± 2.76 |
| A24     | C8   | 1.03 ± 0.04 | 56.87 ± 1.25 | G53     | C1'  | 0.93 ± 0.03 | 44.43 ± 1.47 |
| A24     | C2   | 0.99 ± 0.03 | 69.96 ± 0.91 | G54     | C8   | 0.86 ± 0.05 | 66.21 ± 1.73 |
| A24     | C1'  | 0.97 ± 0.03 | 43.79 ± 1.41 | G54     | C1'  | 0.91 ± 0.03 | 45.42 ± 1.59 |
| A25     | C8   | 1.03 ± 0.03 | 61.63 ± 1.10 | A55     | C8   | 0.89 ± 0.03 | 63.25 ± 0.98 |
| A25     | C2   | 1.01 ± 0.02 | 67.27 ± 0.79 | A55     | C2   | 0.89 ± 0.03 | 76.10 ± 1.44 |
| A25     | C1'  | 1.03 ± 0.03 | 40.57 ± 1.30 | A55     | C1'  | 0.92 ± 0.04 | 43.61 ± 1.48 |
| G26     | C8   | 0.91 ± 0.04 | 61.21 ± 1.49 | G56     | C8   | 0.77 ± 0.05 | 60.46 ± 1.59 |
| G26     | C1'  | 0.96 ± 0.04 | 43.03 ± 1.26 | G56     | C1'  | 0.92 ± 0.03 | 39.60 ± 1.65 |
| C27     | C6   | 1.45 ± 0.06 | 81.17 ± 2.30 | A57     | C8   | 1.07 ± 0.03 | 53.27 ± 0.96 |
| C27     | C5   | 1.56 ± 0.02 | 75.92 ± 0.93 | A57     | C1'  | 1.09 ± 0.02 | 36.28 ± 0.86 |
| A28     | C2   | 1.12 ± 0.02 | 65.79 ± 0.51 | A58     | C8   | 1.42 ± 0.01 | 39.88 ± 0.40 |
| A28     | C1'  | 1.16 ± 0.02 | 38.24 ± 0.75 | A58     | C2   | 1.55 ± 0.02 | 43.29 ± 0.30 |
|         |      |             |              | A58     | C1'  | 1.68 ± 0.01 | 22.01 ± 0.33 |
